# Supplementary material
Source: HighWire-hosted journal article supplement (https://www.cmajopen.ca/content/suppl/2020/04/23/8.2.E273)
Supplement: 2019-0074-1-at.pdf [file 2019-0074-1-at.pdf]

## Appendix 1 (as supplied by the authors): Supplemental tables

**Supplemental Table S1.** Table of available RTI preventative vaccines offered for children in each jurisdiction

| Vaccine/<br>intervention | Year of introduction                                                                                                                                                                          | Description of programme (How many<br>doses and when)                                                                                                                                                                                                                                                                                                                                                                                                                                          | Eligibility                                                                                                                                                                                                                                                                          | Uptake during study period (if<br>known)                                                                                                                                                                                                                                                  |
|--------------------------|-----------------------------------------------------------------------------------------------------------------------------------------------------------------------------------------------|------------------------------------------------------------------------------------------------------------------------------------------------------------------------------------------------------------------------------------------------------------------------------------------------------------------------------------------------------------------------------------------------------------------------------------------------------------------------------------------------|--------------------------------------------------------------------------------------------------------------------------------------------------------------------------------------------------------------------------------------------------------------------------------------|-------------------------------------------------------------------------------------------------------------------------------------------------------------------------------------------------------------------------------------------------------------------------------------------|
| Pertussis<br>vaccine     | <ul style="list-style-type: none"> <li>England/ Scotland: whole-cell in 1956<sup>1</sup>, acellular in 2004</li> <li>Ontario: Whole-cell in 1943, acellular in 1997-98<sup>2</sup></li> </ul> | <ul style="list-style-type: none"> <li>England/ Scotland: ages 2,3,4 months and booster at age 3 years 4 months in combination with diphtheria, tetanus and polio</li> <li>Ontario: ages 2, 4, 6 and 18 months</li> </ul>                                                                                                                                                                                                                                                                      | <ul style="list-style-type: none"> <li>England/ Scotland: all children 2 months to 10 years of age</li> <li>Ontario: all children 6 weeks to 5 years of age<sup>3</sup></li> </ul>                                                                                                   | <ul style="list-style-type: none"> <li>England/ Scotland, since 2010: 95% or higher by 2 years of age</li> <li>Ontario, 2013: by 2 years of age (<math>\geq 4</math> doses) 79.7% (75.1, 83.6); by 5 years of age (<math>\geq 5</math> doses): 69.8 % (65.2, 74.0)<sup>4</sup></li> </ul> |
| HiB vaccine              | <ul style="list-style-type: none"> <li>England/ Scotland: 1992<sup>5</sup></li> <li>Ontario: 1986; conjugate vaccines in 1991/92<sup>2</sup></li> </ul>                                       | <ul style="list-style-type: none"> <li>England/ Scotland: three doses under age 1 year with one-month intervals and a fourth booster dose</li> <li>Ontario: given at 2, 4, 6 and 18 months.</li> </ul>                                                                                                                                                                                                                                                                                         | <ul style="list-style-type: none"> <li>England/ Scotland: all children &lt;10 years of age</li> <li>Ontario: all children 6 weeks to 4 years of age and <math>\geq 5</math> years for high-risk individuals (with valid health card)<sup>2</sup></li> </ul>                          | <ul style="list-style-type: none"> <li>England/ Scotland, 1998: 95% by 2 years of age</li> <li>Ontario, 2013: by 2 years of age (<math>\geq 4</math> doses) 75.9% (71.3, 79.9); by 5 years of age (<math>\geq 5</math> doses) 83.4% (79.3, 86.8)<sup>3</sup></li> </ul>                   |
| Influenza<br>vaccine     | <ul style="list-style-type: none"> <li>England/ Scotland: 2013<sup>6</sup></li> <li>Ontario: freely available since 2000<sup>2</sup></li> </ul>                                               | <ul style="list-style-type: none"> <li>England: one dose, but children aged 6 months to 9 years in clinical high-risk groups that have not received influenza vaccine previously should be offered a 2<sup>nd</sup> dose.</li> <li>Ontario: Recommended annually, in the Fall; children 6 months to 8 years of age who have not previously received a dose of influenza vaccine require 2 doses given <math>\geq 4</math> weeks apart; else 1 dose received per season.<sup>2</sup></li> </ul> | <ul style="list-style-type: none"> <li>England/ Scotland: all children aged two to less than 17 years old</li> <li>Ontario: all persons <math>\geq 6</math> mos of age.<sup>2</sup> As of 2015, intranasal spray is also offered freely to residents 2-59 yrs<sup>7</sup></li> </ul> | <ul style="list-style-type: none"> <li>England/ Scotland: no estimate specific to children readily available</li> <li>Ontario, 2013: by 2 years of age (<math>\geq 1</math> dose): 32.1% (28.2, 36.3)<sup>3</sup></li> </ul>                                                              |

<sup>1</sup> [https://www.gov.uk/government/uploads/system/uploads/attachment\\_data/file/514363/Pertussis\\_Green\\_Book\\_Chapter\\_24\\_Ap2016.pdf](https://www.gov.uk/government/uploads/system/uploads/attachment_data/file/514363/Pertussis_Green_Book_Chapter_24_Ap2016.pdf)

<sup>2</sup> [http://www.biotech.ca/wp-content/uploads/2016/04/vaccines\\_1\\_2010-1.pdf](http://www.biotech.ca/wp-content/uploads/2016/04/vaccines_1_2010-1.pdf)

<sup>3</sup> [http://www.health.gov.on.ca/en/pro/programs/immunization/docs/immunization\\_schedule.pdf](http://www.health.gov.on.ca/en/pro/programs/immunization/docs/immunization_schedule.pdf)

<sup>4</sup> <http://healthycanadians.gc.ca/publications/healthy-living-vie-saine/immunization-coverage-children-2013-couverture-vaccinale-enfants/alt/icc-2013-cve-eng.pdf>

<sup>5</sup> <https://www.gov.uk/government/publications/haemophilus-influenzae-type-hib-the-green-book-chapter-16>

<sup>6</sup> [https://www.gov.uk/government/uploads/system/uploads/attachment\\_data/file/663694/Greenbook\\_chapter\\_19\\_Influenza\\_.pdf](https://www.gov.uk/government/uploads/system/uploads/attachment_data/file/663694/Greenbook_chapter_19_Influenza_.pdf)

<sup>7</sup> <https://news.ontario.ca/mohltc/en/2015/10/ontario-giving-parents-more-choice-with-free-nasal-spray-flu-vaccine-for-children.html>

|                                     |                                                                                                                                                                                         |                                                                                                                                                                                                                                                                                                                                                                                                                               |                                                                                                                                                                                                                                                                                                                                                                                                                                                                                                                                                                                                                                                                                                                                                                                            |                                                                                                                                                                                                                                                                                              |
|-------------------------------------|-----------------------------------------------------------------------------------------------------------------------------------------------------------------------------------------|-------------------------------------------------------------------------------------------------------------------------------------------------------------------------------------------------------------------------------------------------------------------------------------------------------------------------------------------------------------------------------------------------------------------------------|--------------------------------------------------------------------------------------------------------------------------------------------------------------------------------------------------------------------------------------------------------------------------------------------------------------------------------------------------------------------------------------------------------------------------------------------------------------------------------------------------------------------------------------------------------------------------------------------------------------------------------------------------------------------------------------------------------------------------------------------------------------------------------------------|----------------------------------------------------------------------------------------------------------------------------------------------------------------------------------------------------------------------------------------------------------------------------------------------|
| Pneumococcal conjugate vaccine      | <ul style="list-style-type: none"> <li>England/ Scotland: 2006</li> <li>Ontario: &lt;5 years since 2005<sup>8</sup></li> </ul>                                                          | <ul style="list-style-type: none"> <li>England/ Scotland: at 8 and 16 weeks of age; booster after age 1 year</li> <li>Ontario: 3 doses recommended at 2-, 4- and 12-months of age.</li> </ul>                                                                                                                                                                                                                                 | <ul style="list-style-type: none"> <li>England/ Scotland: all children age 8 weeks to 2 years</li> <li>Ontario: all children 6 weeks to 4 years of age<sup>9</sup></li> </ul>                                                                                                                                                                                                                                                                                                                                                                                                                                                                                                                                                                                                              | <ul style="list-style-type: none"> <li>England/ Scotland: no estimate specific to children readily available</li> <li>Ontario, 2013: by 2 years of age (≥ 3–4 Doses) 79.5% (75.0, 83.4)</li> </ul>                                                                                           |
| Pneumococcal polysaccharide vaccine | <ul style="list-style-type: none"> <li>England/ Scotland: 2010</li> <li>Ontario: approved in 1983 and publicly funded for high risk groups in Ontario since 1996<sup>7</sup></li> </ul> | <ul style="list-style-type: none"> <li>England/ Scotland: High-risk persons 2-64 years of age</li> <li>Ontario: High-risk persons 2-64 years of age</li> </ul>                                                                                                                                                                                                                                                                | <ul style="list-style-type: none"> <li>England/ Scotland: at-risk children aged 2+ years</li> <li>Ontario: residents with valid health card, the Ontario publicly-funded immunization program covers the cost.<sup>8</sup> High-risk criteria: asplenia, cardiac disease, cerebral spinal fluid leak, cochlear implant recipients, congenital immunodeficiencies, diabetes mellitus, HIV, immunocompromising therapy, liver disease, malignant neoplasms, renal disease, respiratory disease, sickle-cell diseases, solid organ or islet cell transplant, hematopoietic stem cell transplant, neurologic conditions (chronic) that may impair clearance of oral secretions, and residents of nursing homes, homes for the aged and chronic care facilities or wards<sup>8</sup></li> </ul> | <ul style="list-style-type: none"> <li>England/ Scotland: no estimate specific to children readily available</li> <li>Ontario: no estimate specific to children readily available</li> </ul>                                                                                                 |
| Palivizumab                         | <ul style="list-style-type: none"> <li>Ontario: available through special access since 1998, widely approved in 2002.</li> </ul>                                                        | <ul style="list-style-type: none"> <li>England/ Scotland: Given once a month to eligible children during anticipated periods of RSV risk in the community; up to a maximum of 5 doses.</li> <li>Ontario: the “Respiratory Syncytial Virus Prophylaxis for High-Risk Infants” Program is provided monthly during the active season to infants meeting eligibility criteria for funding; maximum of 5 doses covered.</li> </ul> | <ul style="list-style-type: none"> <li>England/ Scotland: Pre-term infants with bronchopulmonary dysplasia (BPD) (+ chronological and gestational age criteria), infants with respiratory disease who remain in oxygen at the start of the RSV season, preterm infants with haemodynamically significant, acyanotic congenital heart disease (CHD) (+ chronological and</li> </ul>                                                                                                                                                                                                                                                                                                                                                                                                         | <ul style="list-style-type: none"> <li>England/ Scotland: coverage in high-risk children is not readily available</li> <li>Ontario: no estimate specific to readily available However, an estimated 3,119 infants received at least 1 dose during the 2015/16 season<sup>12</sup></li> </ul> |

<sup>8</sup> [http://www.health.gov.on.ca/en/public/programs/immunization/docs/pcv\\_hcp\\_qa\\_en.pdf](http://www.health.gov.on.ca/en/public/programs/immunization/docs/pcv_hcp_qa_en.pdf)

<sup>9</sup> [http://www.health.gov.on.ca/en/pro/programs/immunization/docs/immunization\\_schedule.pdf](http://www.health.gov.on.ca/en/pro/programs/immunization/docs/immunization_schedule.pdf)

<sup>12</sup> <http://www.cbc.ca/news/health/rsv-drug-synagis-palivizumab-premature-infants-abbvie-provinces-health-care-1.4056823>

|  |  |  |                                                                                                                                                                                                                                                                                                                                                                                                                                                                                             |  |
|--|--|--|---------------------------------------------------------------------------------------------------------------------------------------------------------------------------------------------------------------------------------------------------------------------------------------------------------------------------------------------------------------------------------------------------------------------------------------------------------------------------------------------|--|
|  |  |  | <p>gestational age criteria), CHD with significant co-morbidities, &lt; 24 months old with Severe Combined Immunodeficiency Syndrome<sup>10</sup></p> <ul style="list-style-type: none"> <li>▪ Ontario: high-risk children (born &lt;32 wGA and ≤ 6mos of age; 33-35 wGA and ≤6 mos of age with risk factors, such as living in an isolated community; &lt;24 mos with Trisomy 21, BPD, or significant CHD.<sup>11</sup> Others may also be considered on a case-by-case basis).</li> </ul> |  |
|--|--|--|---------------------------------------------------------------------------------------------------------------------------------------------------------------------------------------------------------------------------------------------------------------------------------------------------------------------------------------------------------------------------------------------------------------------------------------------------------------------------------------------|--|

<sup>10</sup> [https://assets.publishing.service.gov.uk/government/uploads/system/uploads/attachment\\_data/file/458469/Green\\_Book\\_Chapter\\_27a\\_v2\\_0W.PDF](https://assets.publishing.service.gov.uk/government/uploads/system/uploads/attachment_data/file/458469/Green_Book_Chapter_27a_v2_0W.PDF)

<sup>11</sup> [http://www.health.gov.on.ca/en/pro/programs/drugs/funded\\_drug/fund\\_respiratory.aspx](http://www.health.gov.on.ca/en/pro/programs/drugs/funded_drug/fund_respiratory.aspx)

**Supplemental Table S2.** Details regarding the linked data used for Ontario, Scotland and England

|                                                                       | <b>Ontario</b>                                                                                                                                                                                                             | <b>Scotland</b>                                                                                                                                                                  | <b>England</b>                                                                                                                                                                                                                |
|-----------------------------------------------------------------------|----------------------------------------------------------------------------------------------------------------------------------------------------------------------------------------------------------------------------|----------------------------------------------------------------------------------------------------------------------------------------------------------------------------------|-------------------------------------------------------------------------------------------------------------------------------------------------------------------------------------------------------------------------------|
| <b>Number of included live births during study period (2002-2012)</b> | 1,299,240                                                                                                                                                                                                                  | 547,556                                                                                                                                                                          | 3,910,401                                                                                                                                                                                                                     |
| <b>Linked birth-&gt;hospital records availability</b>                 | April 2002 (if requiring gestational age or if only considering ICD-10); 1988, otherwise                                                                                                                                   | 2000 (if only considering ICD-10); 1981, otherwise                                                                                                                               | 1 <sup>st</sup> January 2003 - 30 <sup>th</sup> March 2014 (births count as inpatient admissions)                                                                                                                             |
| <b>Linked maternity-&gt;birth records availability</b>                | April 2002 (if only considering ICD-10); 1988 otherwise. Prior to April 2002, Maternal-Newborn matching number was not available and institution number, postal code, and admission/discharge dates were used for linkage. | 2000 (if only considering ICD-10); 1981, otherwise                                                                                                                               | Linkage to longitudinal maternal hospital record available between 1 <sup>st</sup> January 2003-30 <sup>th</sup> March 2014. All birth and delivery admissions have a maternity tail with information on the baby and mother. |
| <b>Data items with missing data on birth records and % missing</b>    | Between 2003-2012:<br>Gestational age: 0.01% to 0.24%<br>Maternal age: 2.67% to 3.25%                                                                                                                                      | Between 2003-2012:<br>Gestational age: 3.80% to 4.95%<br>Birthweight: 1.03% to 2.54%<br>Maternal age: 3.01%-5.80%                                                                | N/A: used complete-data subset                                                                                                                                                                                                |
| <b>Basic unit of hospital data</b>                                    | Discharges, linked to create hospitalization episodes in which transfers between hospitals are considered part of the same episode.                                                                                        | Episodes (linked to provide comparable admissions to England)                                                                                                                    | Finished consultant episode (FCE), linked to create admissions where episodes for which the difference between the admission date and previous discharge data is $\leq 0$ belong to same admission.                           |
| <b>Linked hospital records available from</b>                         | Hospital admissions discharged from April 1988 onwards                                                                                                                                                                     | Admissions ending 1 <sup>st</sup> Jan 1981 onwards                                                                                                                               | FCEs ending 1st April 1997 onwards                                                                                                                                                                                            |
| <b>Linked mortality-&gt;hospital admission data availability</b>      | Deaths registered Jan 1990 onwards                                                                                                                                                                                         | Deaths registered 1 <sup>st</sup> Jan 1980 onwards (linked to hospital birth records); Deaths registered 1 <sup>st</sup> Jan 1981 onwards (linked to hospital inpatient records) | Deaths registered 1 <sup>st</sup> January 1998 onwards                                                                                                                                                                        |
| <b>Number of diagnoses per episode or admission</b>                   | Before April 2002: 10/discharge; from April 2002 onward: 25/discharge                                                                                                                                                      | Up to 6/admission                                                                                                                                                                | 1997-2001: up to 7/FCE;<br>2002-2006: up to 14/FCE;<br>2007-2010: up to 20/FCE                                                                                                                                                |
| <b>Number of ICD-10 coded causes of death in linked data</b>          | Before 2013: Up to 12 mentions; from 2013 onward up to 22 mentions                                                                                                                                                         | Up to 11 mentions                                                                                                                                                                | Up to 15 mentions                                                                                                                                                                                                             |
| <b>Date ICD-10 coding introduced on hospital records</b>              | Discharges: 1 <sup>st</sup> April 2002 onwards                                                                                                                                                                             | Admissions ending 1 <sup>st</sup> April 1996 onwards                                                                                                                             | FCEs ending 1 <sup>st</sup> April 1997 onwards                                                                                                                                                                                |
| <b>Date ICD-10 coding introduced on death registration data</b>       | Deaths registered January 2000 onward                                                                                                                                                                                      | Deaths registered 1 <sup>st</sup> January 2000 onwards                                                                                                                           | Deaths registered 1 <sup>st</sup> January 2001 onwards                                                                                                                                                                        |
| <b>Variables used for linkage to death registration records</b>       | Deterministic and probabilistic linkage based on direct identifiers such as name, postal code, and date of birth                                                                                                           | Deterministic linkage based on CHI number                                                                                                                                        | Hierarchical algorithm based on combinations of: NHS number, date of birth, sex, postcode                                                                                                                                     |
| <b>Variables used for linkage of hospital records across time</b>     | Health card number                                                                                                                                                                                                         | CHI number                                                                                                                                                                       | Hierarchical algorithm based on combinations of: NHS number, date of birth, sex, postcode, provider, local patient ID                                                                                                         |

**Supplemental Table S3.** ICD-10 codes used to identify high risk medical conditions

| <i>Major congenital and other neurological impairments or anomalies</i> |                                                                         | <i>Cardiac and respiratory systems anomalies and other severe chronic diseases</i> |                                                                                           |
|-------------------------------------------------------------------------|-------------------------------------------------------------------------|------------------------------------------------------------------------------------|-------------------------------------------------------------------------------------------|
| <b>ICD-10 Code</b>                                                      | <b>Description</b>                                                      | <b>ICD-10 Code</b>                                                                 | <b>Description</b>                                                                        |
| Q00                                                                     | Anencephaly and similar malformations                                   | Q18.0                                                                              | Sinus, fistula and cyst of branchial cleft                                                |
| Q01                                                                     | Encephalocele                                                           | Q20-28                                                                             | Congenital malformations, circulatory system                                              |
| Q02                                                                     | Microcephaly                                                            | Q30-34                                                                             | Congenital anomalies, respiratory system                                                  |
| Q04                                                                     | Other congenital malformations of brain                                 | Q35-37                                                                             | Cleft lip and cleft palate                                                                |
| Q05, Q07.0,                                                             | Spina Bifida                                                            | P25                                                                                | Interstitial emphysema and related conditions originating in the perinatal period         |
| G91                                                                     | Hydrocephalus                                                           | P27                                                                                | Chronic respiratory disease originating in the perinatal period                           |
| G94.0                                                                   | Hydrocephalus in infectious and parasitic diseases classified elsewhere | E84, P75                                                                           | Cystic Fibrosis                                                                           |
| G94.1                                                                   | Hydrocephalus in neoplastic disease                                     | I01-I02.0                                                                          | Acute Rheumatic Fever                                                                     |
| G94.2                                                                   | Hydrocephalus in other diseases classified elsewhere                    | I05.0-I09.9                                                                        | Chronic rheumatic fever                                                                   |
| G95, G96, G98, G99                                                      | Other disorders of the nervous system                                   | I11-I13                                                                            | Hypertensive diseases                                                                     |
| Q03                                                                     | Congenital hydrocephalus                                                | I21-I25                                                                            | ST Elevation, other acute IHD & chronic IHD                                               |
| Q90                                                                     | Down syndrome                                                           | I26-I28                                                                            | Pulmonary heart disease and diseases of pulmonary circulation                             |
| G35-G37                                                                 | Demyelinating diseases of central nervous system                        | I31-I39.8, I41-52                                                                  | Other forms of chronic heart disease                                                      |
| G40                                                                     | Epilepsy and recurrent seizures                                         | I99                                                                                | Other and unspecified disorders, circulatory system                                       |
| G41.0                                                                   | Grand mal status epilepticus                                            | J41-J43.9, J98.2                                                                   | Chronic bronchitis & emphysema                                                            |
| G41.8                                                                   | Other status epilepticus                                                | J45-47                                                                             | Asthma & Bronchiectasis                                                                   |
| G41.9                                                                   | Status epilepticus, unspecified                                         | J96.1                                                                              | Chronic respiratory failure                                                               |
| G71.2                                                                   | Congenital myopathies                                                   | M05.1                                                                              | Rheumatoid lung disease                                                                   |
| G71.3                                                                   | Mitochondrial myopathy, not elsewhere classified                        | A15-19                                                                             | Tuberculosis TB)                                                                          |
| G71.0                                                                   | Muscular dystrophy                                                      | B90                                                                                | Sequelae of TB                                                                            |
| G71.1                                                                   | Myotonic disorders                                                      | P20, P21                                                                           | Fetal asphyxia, Birth asphyxia);                                                          |
| G71.9                                                                   | Primary disorder of muscle, unspecified                                 | P25-P27.9                                                                          | Perinatal Respiratory & Cardiovascular diseases                                           |
| G72.9                                                                   | Myopathy, unspecified                                                   | Q18.0, Q18.8, Q20.0-37.9                                                           | Congenital malformations of the respiratory system                                        |
| G70.9, G90.1                                                            | Familial dysautonomia [riley-day]                                       | D57.0-D57.2; D57.8                                                                 | Sickle cell disease                                                                       |
| Q07.8, Q07.9                                                            | Other specified congenital malformations of nervous system              | D80-D84; D89.8, D89.9                                                              | Hereditary immunodeficiency                                                               |
| Q06, Q07.0                                                              | Other congenital malformations of spinal cord and nervous system        | D55, D56.0-56.2, D56.4, D56.8-D61.9                                                | Anemias                                                                                   |
| F84.2                                                                   | Rett's syndrome                                                         | D55-59                                                                             | Other hemoglobinopathies                                                                  |
| G31.8                                                                   | Other specified degenerative diseases of nervous system                 | D70                                                                                | Neutropenia                                                                               |
| G31.9                                                                   | Degenerative disease of nervous system, unspec                          | D71-72                                                                             | Functional disorders of polymorphonuclear neutrophils and genetic anomalies of leukocytes |

|                        |                                                                                                                             |                    |                                                   |
|------------------------|-----------------------------------------------------------------------------------------------------------------------------|--------------------|---------------------------------------------------|
| G80.0-G82.5            | Cerebral palsy and other paralytic syndromes                                                                                | D73.0              | Spleen disease NOS, Hypersplenism                 |
| Q91.0                  | Trisomy 18, meiotic nondisjunction                                                                                          | D73.1, D73.2       | Hypersplenism and chronic congestive splenomegaly |
| Q91.1                  | Trisomy 18, mosaicism                                                                                                       | Q89.0              | Asplenia/ congenital malformation of spleen       |
| Q91.2                  | Trisomy 18, translocation                                                                                                   | E10                | Type 1 diabetes mellitus                          |
| Q91.3                  | Edwards' syndrome, unspecified                                                                                              | P70.2              | Neonatal diabetes                                 |
| Q93                    | Monosomies and deletions from the autosomes, not elsewhere classified                                                       | N00-N29.8, P96.0   | Chronic and other kidney diseases                 |
| Q95.3                  | Balanced sex/autosomal rearrangement in abnormal individual                                                                 | K71-76             | Chronic liver disease                             |
| Q95.8                  | Other balanced rearrangements and structural markers                                                                        | N04                | Nephrotic syndrome                                |
| Q92                    | Other trisomies and partial trisomies of the autosomes, not elsewhere classified                                            | B24, R75           | HIV Positive                                      |
| Q97, Q98.5-99.0, Q99.2 | Other sex chromosome abnormalities                                                                                          | C00-96, M90.4-90.7 | Diagnosed with malignant neoplasms (of any site)  |
| F70 – F71              | Mild and moderate mental disabilities                                                                                       |                    |                                                   |
| F72                    | Severe mental disabilities                                                                                                  |                    |                                                   |
| F73.0                  | Profound mental disabilities                                                                                                |                    |                                                   |
| G12.0                  | Infantile spinal muscular atrophy, type I                                                                                   |                    |                                                   |
| A81                    | Atypical virus infections of central nervous system                                                                         |                    |                                                   |
| F07.1                  | Post-encephalitic syndrome                                                                                                  |                    |                                                   |
| F80.3                  | Acquired aphasia with epilepsy [Landau-Kleffner]                                                                            |                    |                                                   |
| G04.1                  | Tropical spastic paraplegia                                                                                                 |                    |                                                   |
| G08-G09                | Intracranial and intraspinal phlebitis and thrombophlebitis and sequelae of inflammatory diseases of central nervous system |                    |                                                   |
| G10                    | Huntington's disease                                                                                                        |                    |                                                   |
| G11                    | Hereditary ataxia                                                                                                           |                    |                                                   |
| G12                    | Spinal muscular atrophy and related syndrome                                                                                |                    |                                                   |
| G23.0, G23.8, G23.9,   | Other degenerative diseases of basal ganglia                                                                                |                    |                                                   |
| G24.1,                 | Idiopathic familial dystonia & idiopathic nonfamilial dystonia                                                              |                    |                                                   |
| G24.2                  |                                                                                                                             |                    |                                                   |
| G93.8, G93.9; G94.1    | Other specified disorders of brain                                                                                          |                    |                                                   |
| I69                    | Sequelae of cerebrovascular disease                                                                                         |                    |                                                   |
| P10-P15                | Birth trauma                                                                                                                |                    |                                                   |
| P52.0-P57.9            | Hemorrhagic and hematological disorders of newborn                                                                          |                    |                                                   |
| P91                    | Other disturbances of cerebral status of newborn                                                                            |                    |                                                   |
| Q60                    | Renal agenesis and other reduction defects of kidney                                                                        |                    |                                                   |

**Supplemental Table S4:** Number of all-cause deaths and crude mortality rates (per 100,000 child-years) from 28 days to 4 (inclusive) years of age, 2003-2013, with 95% confidence intervals (CI); by jurisdiction and risk factor

| Risk factor                                                                | Ontario (Canada) |        |                | Scotland     |        |                | England       |        |                |
|----------------------------------------------------------------------------|------------------|--------|----------------|--------------|--------|----------------|---------------|--------|----------------|
|                                                                            | n (%) deaths     | Rate   | 95% CI         | n (%) deaths | Rate   | 95% CI         | n (%) deaths  | Rate   | 95% CI         |
| <b>Sex</b>                                                                 |                  |        |                |              |        |                |               |        |                |
| Male                                                                       | 1,179 (57.09)    | 42.98  | 40.56, 45.51   | 609 (55.82)  | 53.59  | 49.50, 58.02   | 4,032 (56.04) | 51.57  | 50.00, 53.18   |
| Female                                                                     | 886 (42.91)      | 34.10  | 31.89, 36.42   | 482 (44.18)  | 44.76  | 40.93, 48.94   | 3,163 (43.96) | 42.53  | 41.07, 44.03   |
| <b>Gestational age (weeks)</b>                                             |                  |        |                |              |        |                |               |        |                |
| Preterm (<34)                                                              | 288 (13.95)      | 386.00 | 342.70, 433.25 | 136 (12.47)  | 418.49 | 353.75, 495.08 | 1,233 (17.14) | 557.79 | 527.50, 589.80 |
| Late preterm (34-36)                                                       | 214 (10.36)      | 83.58  | 72.76, 95.56   | 128 (11.73)  | 141.54 | 119.03, 168.32 | 762 (10.59)   | 117.68 | 109.61, 126.33 |
| Early term (37-38)                                                         | 602 (29.15)      | 43.43  | 40.03, 47.04   | 203 (18.61)  | 56.51  | 49.25, 64.84   | 1,648 (22.90) | 58.05  | 55.31, 60.92   |
| Term (39-40)                                                               | 821 (39.76)      | 28.01  | 26.13, 29.99   | 361 (33.09)  | 33.07  | 29.83, 36.66   | 2,499 (34.73) | 31.96  | 30.73, 33.24   |
| Late term (41+)                                                            | 139 (6.73)       | 20.10  | 16.89, 23.73   | 140 (12.83)  | 25.77  | 21.84, 30.42   | 1,053 (14.64) | 28.23  | 26.57, 29.99   |
| <b>High-risk chronic condition recorded before 1<sup>st</sup> birthday</b> |                  |        |                |              |        |                |               |        |                |
| Yes                                                                        | 1,089 (52.74)    | 396.99 | 373.76, 421.29 | 575 (52.70)  | 466.73 | 22.65, 26.91   | 4,287 (59.58) | 316.19 | 306.87, 325.80 |
| No                                                                         | 976 (47.26)      | 19.26  | 18.07, 20.51   | 515 (47.25)  | 24.64  | 22.60, 26.87   | 2,908 (40.41) | 20.92  | 20.17, 21.69   |
| <b>High-risk chronic condition recorded before 5<sup>th</sup> birthday</b> |                  |        |                |              |        |                |               |        |                |
| Yes                                                                        | 1,261 (61.07)    | 348.51 | 329.53, 368.29 | 700 (64.16)  | 353.24 | 430.10, 506.48 | 4,850 (67.41) | 284.54 | 276.65, 292.67 |
| No                                                                         | 804 (38.93)      | 16.15  | 15.05, 17.30   | 391 (35.87)  | 19.41  | 17.57, 21.43   | 2,345 (32.59) | 17.30  | 16.62, 18.02   |
| <b>Maternal age (years)</b>                                                |                  |        |                |              |        |                |               |        |                |
| <19                                                                        | 112 (5.42)       | 98.10  | 80.78, 118.04  | 78 (7.15)    | 81.17  | 65.01, 101.33  | 460 (6.39)    | 80.86  | 73.80, 88.60   |
| 19-24                                                                      | 528 (25.57)      | 66.88  | 61.30, 72.84   | 249 (22.80)  | 53.71  | 47.44, 60.82   | 2,053 (28.53) | 60.97  | 58.39, 63.66   |
| 25-29                                                                      | 530 (25.67)      | 35.75  | 32.77, 38.92   | 224 (20.53)  | 40.86  | 35.84, 46.57   | 1,827 (25.39) | 44.63  | 42.63, 46.73   |
| 30-34                                                                      | 496 (24.02)      | 28.12  | 25.70, 30.71   | 251 (23.01)  | 42.14  | 37.24, 47.69   | 1,673 (23.25) | 39.01  | 37.18, 40.92   |
| 35-39                                                                      | 254 (12.30)      | 28.57  | 25.16, 32.31   | 131 (12.01)  | 38.05  | 32.06, 45.15   | 912 (12.68)   | 37.94  | 35.56, 40.49   |
| 40+                                                                        | 81 (3.92)        | 44.48  | 35.32, 55.28   | 35 (3.21)    | 49.76  | 35.72, 69.30   | 270 (3.75)    | 56.87  | 56.87, 56.87   |
| <b>Area-level deprivation quintile</b>                                     |                  |        |                |              |        |                |               |        |                |
| 1st (Least deprived)                                                       | 344 (16.66)      | 27.71  | 24.86, 30.80   | 147 (13.47)  | 36.80  | 31.30, 43.25   | 690 (9.59)    | 30.65  | 28.45, 33.03   |
| 2nd                                                                        | 296 (14.33)      | 30.91  | 27.48, 34.63   | 169 (15.49)  | 43.32  | 37.25, 50.37   | 810 (11.26)   | 34.19  | 31.91, 36.62   |
| 3rd                                                                        | 326 (15.79)      | 34.55  | 30.90, 38.51   | 214 (19.62)  | 48.24  | 42.19, 55.16   | 1,088 (15.12) | 40.05  | 37.74, 42.51   |
| 4th                                                                        | 404 (19.56)      | 42.58  | 38.53, 46.95   | 222 (20.35)  | 47.55  | 41.69, 54.23   | 1,672 (23.24) | 50.43  | 48.07, 52.91   |
| 5th (Most deprived)                                                        | 615 (29.78)      | 52.71  | 48.63, 57.05   | 339 (31.07)  | 66.05  | 59.38, 73.47   | 2,935 (40.79) | 63.74  | 61.47, 66.09   |

**Supplemental Table S5:** Number and crude rate of respiratory tract infection-related mortality (per 100,000 child years) from 28 days to 4 years of age (inclusive), i.e., up to 5<sup>th</sup> birthday, occurring in calendar years 2003-2013, with 95% confidence intervals (CI); by jurisdiction and risk factor

| Risk factor                                                                | Ontario (Canada) |       |              | Scotland     |       |               | England       |       |              |
|----------------------------------------------------------------------------|------------------|-------|--------------|--------------|-------|---------------|---------------|-------|--------------|
|                                                                            | n (%) deaths     | Rate  | 95% CI       | n (%) deaths | Rate  | 95% CI        | n (%) deaths  | Rate  | 95% CI       |
| <b>Sex</b>                                                                 |                  |       |              |              |       |               |               |       |              |
| Male                                                                       | 165 (53.40)      | 6.02  | 5.13, 7.01   | 111 (56.63)  | 9.77  | 8.11, 11.76   | 913 (55.43)   | 11.68 | 10.94, 12.46 |
| Female                                                                     | 144 (46.60)      | 5.54  | 4.67, 6.52   | 85 (43.37)   | 7.89  | 6.38, 9.76    | 734 (44.57)   | 9.87  | 9.18, 10.61  |
| <b>Gestational age (weeks)</b>                                             |                  |       |              |              |       |               |               |       |              |
| Preterm (<34)                                                              | 45 (14.56)       | 60.31 | 43.99, 80.70 | 19 (9.69)    | 58.47 | 37.29, 91.66  | 190 (11.54)   | 85.95 | 74.56, 99.09 |
| Late preterm (34-36)                                                       | 40 (12.94)       | 15.62 | 11.16, 21.27 | 30 (15.31)   | 33.17 | 23.20, 47.45  | 203 (12.33)   | 31.35 | 27.32, 35.97 |
| Early term (37-38)                                                         | 87 (28.16)       | 6.28  | 5.03, 7.74   | 44 (22.45)   | 12.25 | 9.12, 16.46   | 402 (24.41)   | 14.16 | 12.84, 15.61 |
| Term (39-40)                                                               | 120 (38.83)      | 4.09  | 3.39, 4.90   | 69 (35.20)   | 6.32  | 4.99, 8.00    | 612 (37.16)   | 7.83  | 7.23, 8.47   |
| Late term (41+)                                                            | 17 (5.50)        | 2.46  | 1.43, 3.94   | 23 (11.73)   | 4.23  | 2.81, 6.37    | 240 (14.57)   | 6.43  | 5.67, 7.30   |
| <b>High-risk chronic condition recorded before 1<sup>st</sup> birthday</b> |                  |       |              |              |       |               |               |       |              |
| Yes                                                                        | 223 (72.17)      | 81.29 | 70.97, 92.69 | 122 (62.24)  | 99.03 | 82.93, 118.26 | 1,199 (72.80) | 88.43 | 83.57, 93.58 |
| No                                                                         | 86 (27.83)       | 1.70  | 1.36, 2.1    | 74 (37.95)   | 3.54  | 2.82, 4.45    | 448 (27.20)   | 3.22  | 2.94, 3.54   |
| <b>High-risk chronic condition recorded before 5<sup>th</sup> birthday</b> |                  |       |              |              |       |               |               |       |              |
| Yes                                                                        | 259 (83.82)      | 71.58 | 63.13, 80.85 | 156 (79.59)  | 78.72 | 67.29, 92.10  | 1,363 (82.76) | 79.97 | 75.83, 84.33 |
| No                                                                         | 50 (16.18)       | 1.00  | 0.75, 1.32   | 40 (20.51)   | 1.99  | 1.46, 2.71    | 284 (17.24)   | 2.10  | 1.87, 2.35   |
| <b>Maternal age (years)</b>                                                |                  |       |              |              |       |               |               |       |              |
| <19                                                                        | 17 (5.50)        | 14.89 | 8.67, 23.84  | 10 (5.10)    | 10.41 | 5.60, 19.34   | 78 (4.74)     | 13.71 | 10.98, 17.12 |
| 19-24                                                                      | 56 (18.12)       | 7.09  | 5.36, 9.21   | 47 (23.98)   | 10.14 | 7.62, 13.49   | 463 (28.11)   | 13.75 | 12.55, 15.06 |
| 25-29                                                                      | 88 (28.48)       | 5.94  | 4.76, 7.31   | 37 (18.88)   | 6.75  | 4.89, 9.31    | 429 (26.05)   | 10.48 | 9.53, 11.52  |
| 30-34                                                                      | 79 (25.57)       | 4.48  | 3.55, 5.58   | 46 (23.47)   | 7.72  | 5.79, 10.31   | 393 (23.86)   | 9.16  | 8.30, 10.12  |
| 35-39                                                                      | 40 (12.94)       | 4.50  | 3.21, 6.13   | 37 (18.88)   | 10.75 | 7.79, 14.83   | 221 (13.42)   | 9.19  | 8.06, 10.49  |
| 40+                                                                        | 21 (6.80)        | 11.53 | 7.14, 17.63  | 8 (4.08)     | 11.37 | 5.69, 22.74   | 63 (3.83)     | 11.78 | 9.20, 15.08  |
| <b>Area-level deprivation quintile</b>                                     |                  |       |              |              |       |               |               |       |              |
| 1st (Least deprived)                                                       | 50 (16.18)       | 4.03  | 2.99, 5.31   | 23 (11.73)   | 5.76  | 3.83, 8.37    | 161 (9.78)    | 7.15  | 6.13, 8.35   |
| 2nd                                                                        | 59 (19.09)       | 6.16  | 4.69, 7.95   | 32 (16.33)   | 8.20  | 5.80, 11.60   | 175 (10.63)   | 7.39  | 6.37, 8.57   |
| 3rd                                                                        | 45 (14.56)       | 4.77  | 3.48, 6.38   | 35 (17.86)   | 7.89  | 5.66, 10.99   | 260 (15.79)   | 9.57  | 8.48, 10.81  |
| 4th                                                                        | 58 (18.77)       | 6.11  | 4.64, 7.90   | 56 (28.57)   | 11.99 | 9.23, 15.58   | 379 (23.01)   | 11.43 | 10.34, 12.64 |
| 5th (Most deprived)                                                        | 86 (27.83)       | 7.37  | 5.90, 9.10   | 50 (25.51)   | 9.74  | 7.38, 12.85   | 672 (40.8)    | 14.59 | 13.53, 15.74 |



**Supplemental Table S6:** Results from Cox proportional hazards models 28-364 days of age: adjusted\* hazard ratios (with 95% confidence intervals) for respiratory tract infection-related mortality, by jurisdiction

| Risk factor                            | Ontario (Canada) |               | Scotland |              | England |              |
|----------------------------------------|------------------|---------------|----------|--------------|---------|--------------|
|                                        | HR               | 95% CI        | HR       | 95% CI       | HR      | 95% CI       |
| <b>Sex</b>                             |                  |               |          |              |         |              |
| Male                                   | REF              |               | REF      |              | REF     |              |
| Female                                 | 1.16             | 0.85, 1.57    | 0.70     | 0.46, 1.05   | 1.04    | 0.94, 1.14   |
| <b>Gestational age (weeks)</b>         |                  |               |          |              |         |              |
| Preterm (<34)                          | 2.21             | 1.39, 3.52    | 1.58     | 0.80, 3.13   | 3.43    | 2.91, 4.05   |
| Late preterm (34-36)                   | 1.85             | 1.11, 3.08    | 2.73     | 1.53, 4.86   | 3.03    | 2.59, 3.55   |
| Early term (37-38)                     | 1.42             | 0.97, 2.09    | 1.41     | 0.84, 2.38   | 1.79    | 1.58, 2.03   |
| Term (39-40)                           | REF              |               | REF      |              | REF     |              |
| Late term (41+)                        | 0.69             | 0.36, 1.31    | 0.64     | 0.32, 1.30   | 0.7     | 0.60, 0.81   |
| <b>High-risk chronic condition</b>     |                  |               |          |              |         |              |
| No                                     | REF              |               | REF      |              | REF     |              |
| Yes, recorded <1 year of age           | 78.17            | 51.58, 118.49 | 25.25    | 16.68, 40.35 | 35.47   | 31.17, 40.36 |
| <b>Maternal age (years)</b>            |                  |               |          |              |         |              |
| <19                                    | 2.39             | 1.10, 5.20    | 1.87     | 0.73, 4.76   | 1.09    | 0.85, 1.39   |
| 19-24                                  | 1.79             | 1.12, 2.88    | 1.71     | 0.96, 3.04   | 1.22    | 1.07, 1.40   |
| 25-29                                  | 1.42             | 0.92, 2.20    | 0.90     | 0.48, 1.69   | 1.03    | 0.90, 1.19   |
| 30-34                                  | REF              |               | REF      |              | REF     |              |
| 35-39                                  | 1.12             | 0.66, 1.91    | 1.37     | 0.48, 2.60   | 0.99    | 0.84, 1.17   |
| 40+                                    | 3.33             | 1.84, 6.00    | 1.71     | 0.64, 4.17   | 1.12    | 0.85, 1.46   |
| <b>Area-level deprivation quintile</b> |                  |               |          |              |         |              |
| 1st (Least deprived)                   | REF              |               | REF      |              | REF     |              |
| 2nd                                    | 1.33             | 0.79, 2.24    | 0.85     | 0.39, 1.84   | 0.98    | 0.79, 1.22   |
| 3rd                                    | 1.02             | 0.59, 1.77    | 1.32     | 0.66, 2.62   | 1.23    | 1.01, 1.50   |
| 4th                                    | 0.92             | 0.52, 1.61    | 1.83     | 0.96, 3.48   | 1.44    | 1.19, 1.73   |
| 5th (Most deprived)                    | 1.70             | 1.07, 2.71    | 1.34     | 0.70, 2.45   | 1.78    | 1.49, 2.12   |

\*Adjusted for all listed covariates. CI=confidence interval; HR=hazard ratio

**Supplemental Table S7:** Results from Cox proportional hazards models 1-4 years of age: adjusted\* hazard ratios (with 95% confidence intervals) for respiratory tract infection-related mortality, by jurisdiction

| Risk factor                            | Ontario (Canada) |               | Scotland |               | England |              |
|----------------------------------------|------------------|---------------|----------|---------------|---------|--------------|
|                                        | HR               | 95% CI        | HR       | 95% CI        | HR      | 95% CI       |
| <b>Sex</b>                             |                  |               |          |               |         |              |
| Male                                   | REF              |               | REF      |               | REF     |              |
| Female                                 | 1.13             | 0.80, 1.58    | 1.22     | 0.79, 1.87    | 0.98    | 0.86, 1.12   |
| <b>Gestational age (weeks)</b>         |                  |               |          |               |         |              |
| Preterm (<34)                          | 1.81             | 1.04, 3.17    | 1.71     | 0.50, 3.88    | 4.3     | 3.52, 5.24   |
| Late preterm (34-36)                   | 2.07             | 1.23, 3.49    | 2.36     | 1.19, 4.69    | 3.88    | 3.18, 4.74   |
| Early term (37-38)                     | 1.19             | 0.78, 1.80    | 1.52     | 0.87, 2.63    | 2.01    | 1.69, 2.37   |
| Term (39-40)                           | REF              |               | REF      |               | REF     |              |
| Late term (41+)                        | 0.40             | 0.17, 0.93    | 0.81     | 0.43, 1.53    | 0.61    | 0.49, 0.75   |
| <b>High-risk chronic condition</b>     |                  |               |          |               |         |              |
| No                                     | REF              |               | REF      |               | REF     |              |
| Yes, recorded <5 years of age          | 64.55            | 40.60, 102.64 | 57.77    | 31.18, 107.03 | 40.83   | 34.60, 48.17 |
| <b>Maternal age (years)</b>            |                  |               |          |               |         |              |
| <19                                    | 2.39             | 1.16, 4.96    | 0.72     | 0.25, 2.06    | 1.13    | 0.82, 1.57   |
| 19-24                                  | 0.86             | 0.50, 1.48    | 0.61     | 0.32, 1.14    | 1.29    | 1.07, 1.54   |
| 25-29                                  | 1.05             | 0.68, 1.62    | 0.63     | 0.34, 1.16    | 1.16    | 0.97, 1.39   |
| 30-34                                  | REF              |               | REF      |               | REF     |              |
| 35-39                                  | 0.79             | 0.46, 1.38    | 1.18     | 0.64, 2.15    | 1.04    | 0.83, 1.29   |
| 40+                                    | 0.93             | 0.37, 2.35    | 0.88     | 0.27, 2.92    | 1.31    | 0.94, 1.82   |
| <b>Area-level deprivation quintile</b> |                  |               |          |               |         |              |
| 1st (Least deprived)                   | REF              |               | REF      |               | REF     |              |
| 2nd                                    | 1.63             | 0.92, 2.87    | 2.97     | 1.24, 7.07    | 1.01    | 0.75, 1.37   |
| 3rd                                    | 1.13             | 0.61, 2.10    | 2.02     | 0.82, 4.98    | 1.36    | 1.04, 1.79   |
| 4th                                    | 1.84             | 1.06, 3.19    | 3.11     | 1.33, 7.27    | 1.68    | 1.30, 2.17   |
| 5th (Most deprived)                    | 1.26             | 0.72, 2.20    | 2.30     | 0.96, 5.54    | 2.35    | 1.84, 2.99   |

\*Adjusted for all listed covariates. CI=confidence interval; HR=hazard ratio
